# Supplementary material for: Enhanced photovoltaic performance by synergism of light-cultivation and electronic localization for highly efficient dye-sensitized solar cells
Source: Royal Society of Chemistry journal article supplement (doi:10.1039/b905103a), 2009-01-01
Supplement: b905103a.pdf [file b905103a.pdf]

## Supporting Information for

### **Enhanced photovoltaic performance by synergism of light-cultivation and electronic localization for highly efficient dye-sensitized solar cells**

**Jen-Fu Yin,<sup>a</sup> Dibyendu Bhattacharya,<sup>b</sup> Ying-Chan Hsu,<sup>b</sup> Chen-Chuan Tsai,<sup>b</sup> Kuang-Lieh Lu,<sup>\*b</sup> Hong-Cheu Lin,<sup>\*a</sup> Jian-Ging Chen<sup>c</sup> and Kuo-Chuan Ho<sup>c</sup>**

<sup>a</sup> *Department of Materials Science and Engineering, National Chiao Tung University, Hsinchu 300, Taiwan*

<sup>b</sup> *Institute of Chemistry, Academia Sinica, Taipei 115, Taiwan. Fax: 886-2-27831237; Tel: 886-2-27898518; E-mail: lu@chem.sinica.edu.tw*

<sup>c</sup> *Department of Chemical Engineering, National Taiwan University, Taipei 106, Taiwan*

## 1. Experimental section

### (1) Synthesis of ligands **opip** and **otip**

The synthetic procedure of **opip** and **otip** are showed in Scheme S1.

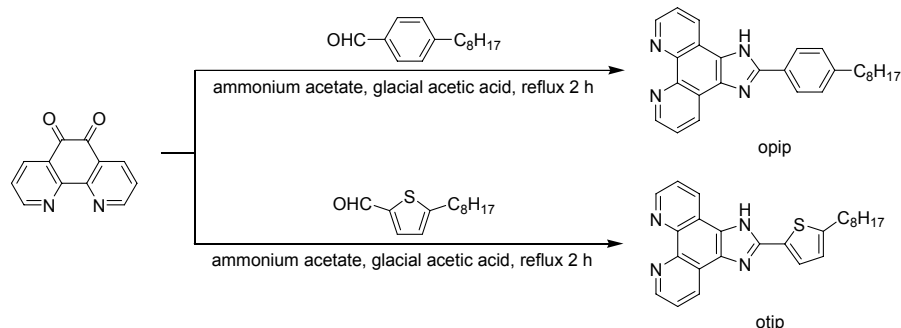

**Scheme S1.** Synthesis of ligands **opip** and **otip**.

### (2) Synthesis of ruthenium sensitizers **JF-1** and **JF-2**

The one-pot synthetic procedure developed for heteroleptic polypyridyl ruthenium complexes was employed for the preparation of new sensitizers **JF-1** and **JF-2**. The synthetic procedure of **JF-1** and **JF-2** were showed in Scheme S2.

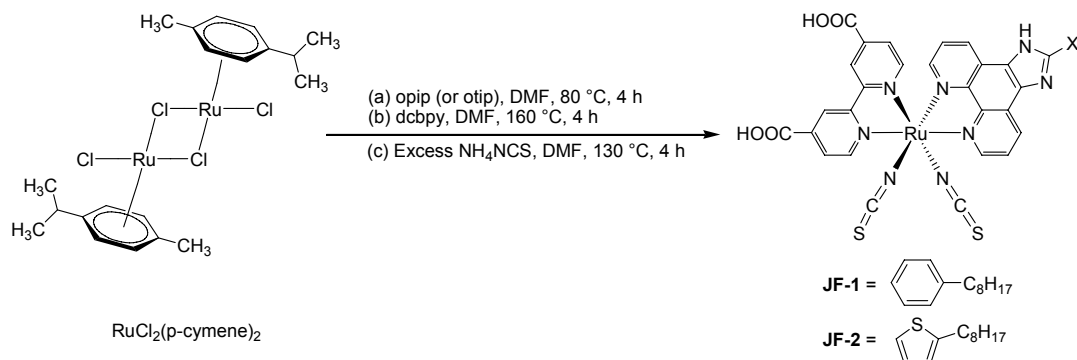

**Scheme S2.** Synthesis of ruthenium sensitizers **JF-1** and **JF-2**.

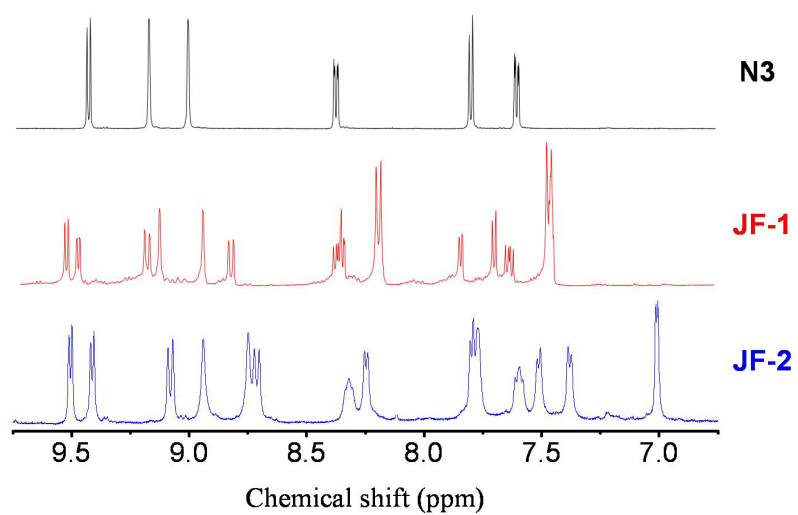

**Fig. S1** <sup>1</sup>H-NMR spectrum (aromatic region) of **N3**, **JF-1** and **JF-2** in d<sub>6</sub>-DMSO.

## 2. The spectra mismatch factor (M)

The deviation in power-conversion efficiency can be calculated from the spectra mismatch factor (M) using equation 1,

$$M = \frac{\int_{\lambda_1}^{\lambda_2} E_R(\lambda) S_R(\lambda) d\lambda \int_{\lambda_1}^{\lambda_2} E_S(\lambda) S_T(\lambda) d\lambda}{\int_{\lambda_1}^{\lambda_2} E_R(\lambda) S_T(\lambda) d\lambda \int_{\lambda_1}^{\lambda_2} E_S(\lambda) S_R(\lambda) d\lambda} \quad (1)$$

where  $E_R(\lambda)$  is the reference spectral irradiance,  $E_S(\lambda)$ , the source spectral irradiance,  $S_R(\lambda)$ , the spectral responsivity of the reference cell, and  $S_T(\lambda)$ , the spectral responsivity of the cell that was fabricated by us. In this instance, we used a Si reference solar cell (Oriel 91150, calibrated by the National Renewable Energy Laboratory (NREL) as the reference cell.

### 3. The UV-vis absorption and emission spectra of opip and otip

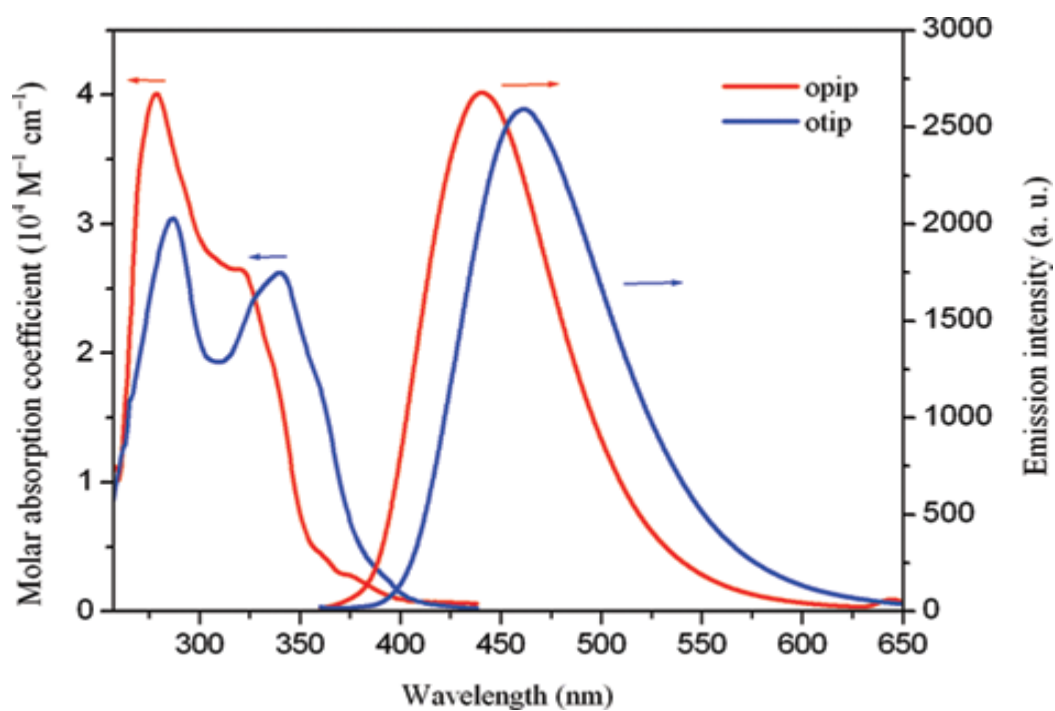

**Fig. S2** UV-vis absorption and emission spectra of the free ligands, opip and otip, in DMF.

#### 4. Computational selected bond lengths [ $\text{\AA}$ ] and angles (deg) of complexes **JF-1** and **JF-2**

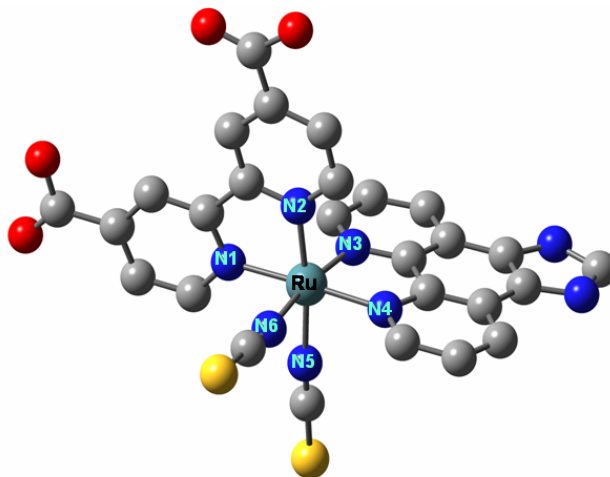

**Fig. S3** Structural schematic diagrams of **JF-1** and **JF-2** for atom numbering.

**Table S1** Selected bond distances [ $\text{\AA}$ ] and angles [deg] of complexes **JF-1** and **JF-2** in calculated singlet ground-state geometry using the DFT at the B3LYP/LanL2DZ level.

| Compound    | Ru–N1 | Ru–N2 | Ru–N3 | Ru–N4 | Ru–N5 | Ru–N6 | N1–Ru–N4 | N2–Ru–N5 |
|-------------|-------|-------|-------|-------|-------|-------|----------|----------|
| <b>JF-1</b> | 2.02  | 2.01  | 2.03  | 2.04  | 2.05  | 2.05  | 177.97   | 173.13   |
| <b>JF-2</b> | 2.04  | 2.05  | 2.07  | 2.07  | 2.06  | 2.05  | 177.30   | 172.18   |

## 5. Relative frontier molecular energy level diagram of complexes JF-1 and JF-2

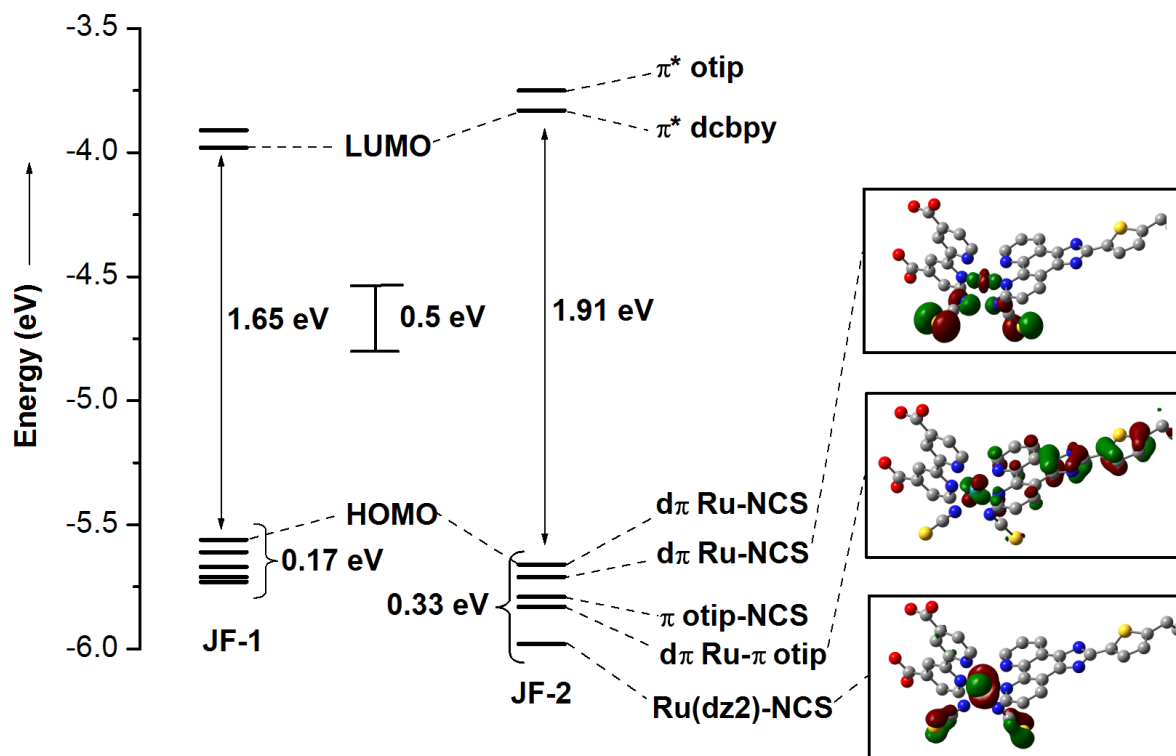

**Fig. S4** Energy and character of the frontier MOs of JF-1 and JF-2. Also shown are isodensity plots of selected MOs. For better clarity on the major components in the MOs, we set isovalue = 0.04 for these plots.
